# Supplementary material for: Head-Space SPME for the Analysis of Organophosphorus Insecticides by Novel Silica IL-Based Fibers in Real Samples
Source: MDPI journal article supplement (doi:10.3390/molecules27154688), 2022-07-22
Supplement: s1 [file s1]

## Supplementary Materials

# Head-space SPME for the analysis of organophosphorous insecticide by silica IL-based fibers in real samples

Karolina Delińska <sup>a,\*</sup>, Kateryna Yavir <sup>a</sup>, Adam Kloskowski <sup>a</sup>

<sup>a</sup> Gdansk University of Technology, Faculty of Chemistry, Department of Physical Chemistry,  
Narutowicza Str.11/12, Gdansk 80-233 Poland

*\* Corresponding author e-mail address: karolina.delinska@pg.edu.pl (K. Delińska)*

Table S1. Physicochemical properties of the studied insecticides.

| compound        | structure                                                                           | pKa value | molecular weight [g/mol] | CAS number | logK <sub>ow</sub> | purity [%] |
|-----------------|-------------------------------------------------------------------------------------|-----------|--------------------------|------------|--------------------|------------|
| heptenophos     | 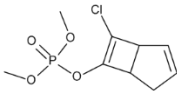  | 2.72      | 250.61                   | 23560-59-0 | 2.32               | ≥ 98.0     |
| dimethoate      |  | 0.78      | 229.3                    | 60-51-5    | 0.78               | ≥ 98.0     |
| diazinon        |  | 3.11      | 304.35                   | 333-41-5   | 3.30               | ≥ 98.0     |
| paraoxon ethyl  |  | 1.98      | 275.19                   | 311-45-5   | 1.98               | ≥ 95.0     |
| fenitrothion    |  | n.a.      | 277.23                   | 122-14-5   | 3.30               | ≥ 95.0     |
| chlorfenvinphos |  | 4.70      | 359.6                    | 470-90-6   | 3.81               | ~ 90%      |
| phosalone       |  | 4.38      | 367.81                   | 2310-17-0  | 4.38               | ≥ 98.0     |

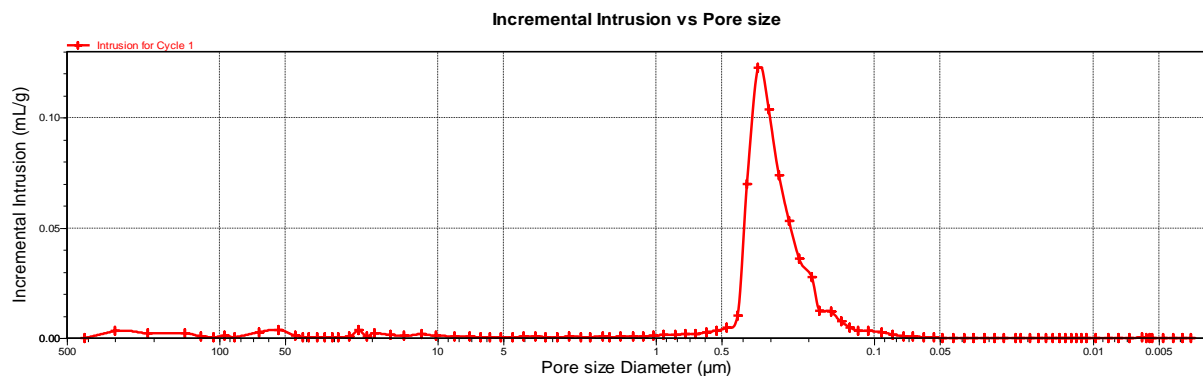

Figure S1. Mercury Intrusion Porosimetry: Plot of incremental intrusion vs. pore size. The measurement was performed with the use of AutoPore IV 9500 V1.09 Micrometrics Instrument Corporation.

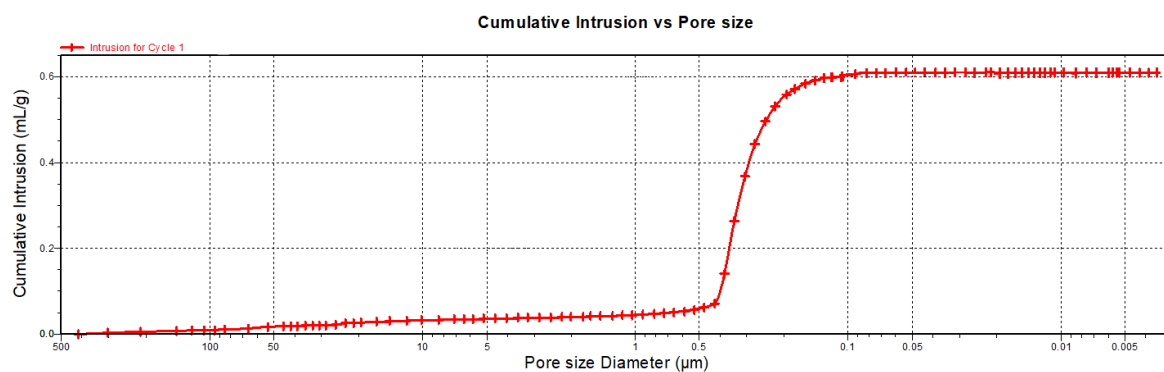

Figure S2. Mercury Intrusion Porosimetry: Cumulative intrusion vs. pore size. The measurement was performed with the use of AutoPore IV 9500 V1.09 Micrometrics Instrument Corporation.

Table S2. Physicochemical properties of the studied ionic liquids.

| Ionic liquid (IL)                                                         | IL structure                                                                       | Acronym of IL | MW         | T <sub>m</sub> | T <sub>d</sub> | d    | η    | CAS                 |
|---------------------------------------------------------------------------|------------------------------------------------------------------------------------|---------------|------------|----------------|----------------|------|------|---------------------|
| 1-Butyl-1-methylpyrrolidinium bis(trifluoromethylsulfonyl) imide          | 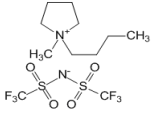  | IL-1          | 422.4      | <RT            | 360            | 1.40 | 95   | 2234<br>37-<br>11-4 |
| 1-Benzyl-3-methylimidazolium bis(trifluoromethylsulfonyl)imide            |   | IL-2          | 208.6<br>9 | <RT            | 396            | 1.49 | 135  | 4333<br>37-<br>24-7 |
| 1-(2-Methoxyethyl)-3-methylimidazolium bis(trifluoromethylsulfonyl) imide |   | IL-3          | 421.3<br>4 | <RT            | 358            | n.a. | 46.9 | 1786<br>31-<br>01-1 |
| Butyltriethyl ammonium bis(trifluoromethylsulfonyl) imide                 |  | IL-4          | 369.4      | <RT            | >220           | 1.39 | 99.5 | 2582<br>73-<br>75-5 |

<sup>a</sup> MW – molecular weight;<sup>b</sup> T<sub>m</sub> – melting point[°C];<sup>c</sup> T<sub>d</sub> – decomposition temperature[°C];<sup>d</sup> d – density [g\*cm<sup>3</sup>];<sup>e</sup> η – viscosity [cP];

CAS – CAS number

Table S3. CCD plan and responses (sum of the peak areas), which were obtained to extract the insecticides with the investigated IL-2 based fiber.

| No | System (CCD) | Extraction time [min] | Equilibration time [min] | Temperature [°C] | Salt concentration [%] | pH | Chromatographic peak area |
|----|--------------|-----------------------|--------------------------|------------------|------------------------|----|---------------------------|
| 1  | 25           | 70                    | 50                       | 60               | 15                     | 3  | 5468                      |
| 2  | 20           | 70                    | 80                       | 60               | 15                     | 7  | 9366                      |
| 3  | 14           | 90                    | 65                       | 50               | 20                     | 5  | 10935                     |
| 4  | 13           | 90                    | 65                       | 50               | 10                     | 9  | 9941                      |
| 5  | 31 (C)       | 70                    | 50                       | 60               | 15                     | 7  | 8129                      |
| 6  | 9            | 90                    | 35                       | 50               | 10                     | 5  | 5965                      |
| 7  | 32 (C)       | 70                    | 50                       | 60               | 15                     | 7  | 7921                      |
| 8  | 8            | 50                    | 65                       | 70               | 20                     | 5  | 6416                      |
| 9  | 30 (C)       | 70                    | 50                       | 60               | 15                     | 7  | 8745                      |
| 10 | 7            | 50                    | 65                       | 70               | 10                     | 9  | 4447                      |
| 11 | 17           | 30                    | 50                       | 60               | 15                     | 7  | 4474                      |
| 12 | 36 (C)       | 70                    | 50                       | 60               | 15                     | 7  | 8153                      |
| 13 | 1            | 50                    | 35                       | 50               | 10                     | 9  | 3872                      |
| 14 | 33 (C)       | 70                    | 50                       | 60               | 15                     | 7  | 8986                      |
| 15 | 26           | 70                    | 50                       | 60               | 15                     | 11 | 7459                      |
| 16 | 29 (C)       | 70                    | 50                       | 60               | 15                     | 7  | 8201                      |
| 17 | 22           | 70                    | 50                       | 80               | 15                     | 7  | 9941                      |
| 18 | 2            | 50                    | 35                       | 50               | 20                     | 5  | 7570                      |
| 19 | 19           | 70                    | 20                       | 60               | 15                     | 7  | 9861                      |
| 20 | 21           | 70                    | 50                       | 40               | 15                     | 7  | 4971                      |
| 21 | 12           | 90                    | 35                       | 70               | 20                     | 5  | 9444                      |
| 22 | 18           | 110                   | 50                       | 60               | 15                     | 7  | 11432                     |
| 23 | 28 (C)       | 70                    | 50                       | 60               | 15                     | 7  | 8651                      |
| 24 | 34 (C)       | 70                    | 50                       | 60               | 15                     | 7  | 8742                      |
| 25 | 35 (C)       | 70                    | 50                       | 60               | 15                     | 7  | 7987                      |
| 26 | 15           | 90                    | 65                       | 70               | 10                     | 5  | 10935                     |
| 27 | 6            | 50                    | 65                       | 50               | 20                     | 9  | 7099                      |
| 28 | 4            | 50                    | 35                       | 70               | 20                     | 9  | 8947                      |
| 29 | 3            | 50                    | 35                       | 70               | 10                     | 5  | 5064                      |
| 30 | 16           | 90                    | 65                       | 70               | 20                     | 9  | 11929                     |
| 31 | 10           | 90                    | 35                       | 50               | 20                     | 9  | 6959                      |
| 32 | 23           | 70                    | 50                       | 60               | 5                      | 7  | 4474                      |
| 33 | 11           | 90                    | 35                       | 70               | 10                     | 9  | 8947                      |
| 34 | 27 (C)       | 70                    | 50                       | 60               | 15                     | 7  | 9341                      |
| 35 | 5            | 50                    | 65                       | 50               | 10                     | 5  | 3067                      |
| 36 | 24           | 70                    | 50                       | 60               | 25                     | 7  | 12128                     |

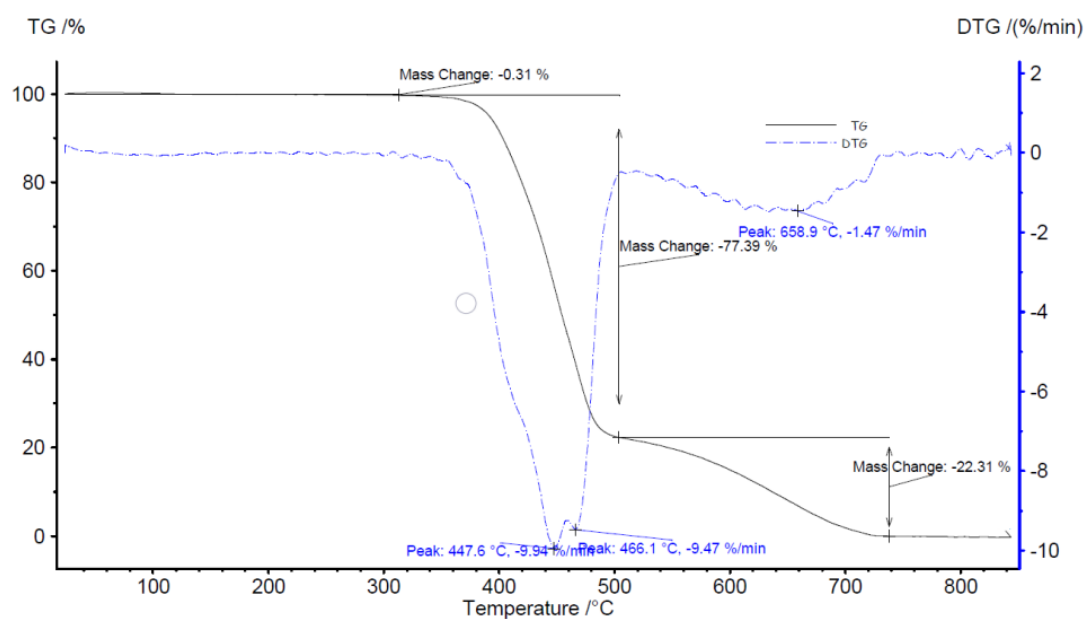

Figure S3. Thermogravimetric analysis of pure ionic liquid, namely 1-Benzyl-3-methylimidazolium bis(trifluoromethylsulfonyl) imide.

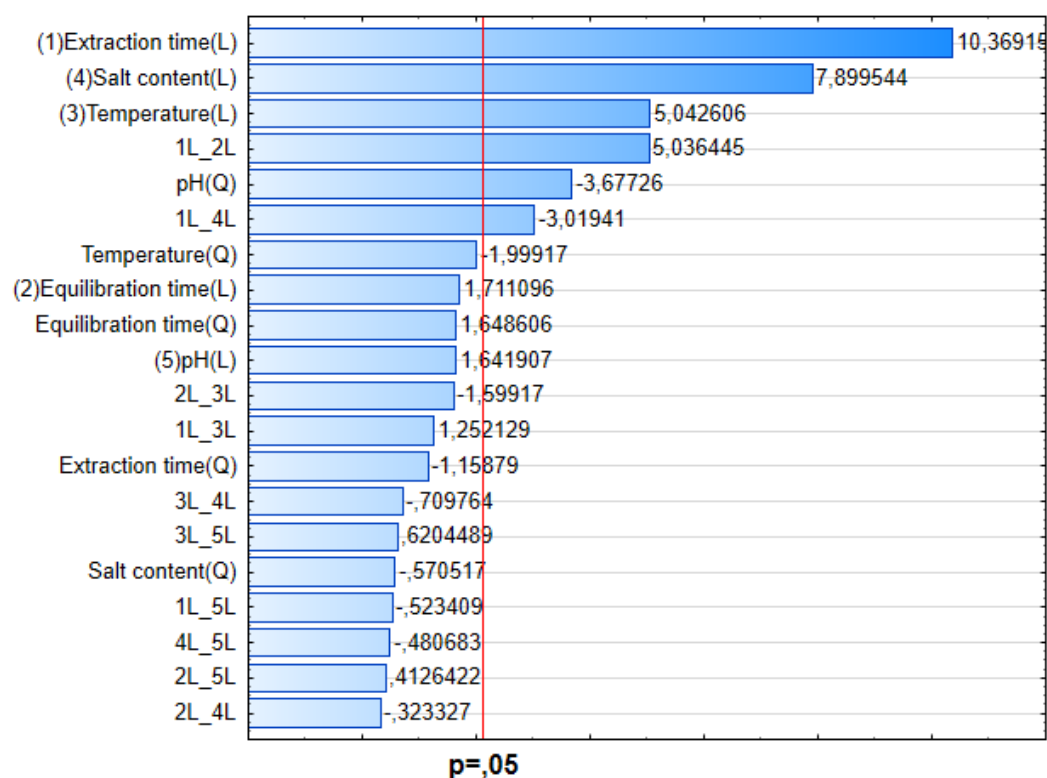

Figure S4. Statistical significance of the effects of the extraction parameters on extraction performance of the IL-based fiber: standardized effect Pareto chart.
